# Supplementary material for: Prediction of thermodynamically stable Li–B compounds at ambient pressure
Source: Royal Society of Chemistry journal article supplement (doi:10.1039/c6cp08900c), 2017-01-01
Supplement: c6cp08900c1.pdf [file c6cp08900c1.pdf]

Table S1. Optimized structural parameters of other metastable Li-B compounds like  $\text{Li}_6\text{B}_5$ ,  $\text{Li}_5\text{B}_4$ ,  $\text{Li}_7\text{B}_6$ ,  $\text{LiB}_4$ , and  $\text{LiB}_6$  at ambient pressure.

| Structure                             | Lattice parameters |         | Wyckoff position |        |         |        |
|---------------------------------------|--------------------|---------|------------------|--------|---------|--------|
|                                       | (Å, deg.)          |         |                  | $x$    | $y$     | $z$    |
| $\text{Li}_6\text{B}_5$<br>( $R-3$ )  | $a=4.777$          |         | Li: $6f$         | 0.4162 | 0.7511  | 0.0829 |
|                                       | $\alpha=92.2$      |         | B: $1a$          | 0.0000 | 0.00000 | 0.0000 |
|                                       |                    |         | B: $2c$          | 0.4000 | 0.4000  | 0.4000 |
|                                       |                    |         | B: $2c$          | 0.8000 | 0.8000  | 0.8000 |
| $\text{Li}_6\text{B}_5$<br>( $P31m$ ) | $a= 6.886$         |         | Li: $3c$         | 0.0000 | 0.3323  | 0.2966 |
|                                       | $c= 7.946$         |         | Li: $3c$         | 0.0000 | 0.6669  | 0.1297 |
|                                       |                    |         | Li: $3c$         | 0.0000 | 0.3336  | 0.6283 |
|                                       |                    |         | Li: $3c$         | 0.0000 | 0.6675  | 0.4627 |
|                                       |                    |         | Li: $3c$         | 0.0000 | 0.6656  | 0.7949 |
|                                       |                    |         | Li: $3c$         | 0.0000 | 0.3342  | 0.9621 |
|                                       |                    |         | B: $1a$          | 0.0000 | 0.0000  | 0.1989 |
|                                       |                    |         | B: $1a$          | 0.0000 | 0.0000  | 0.3989 |
|                                       |                    |         | B: $1a$          | 0.0000 | 0.0000  | 0.5989 |
|                                       |                    |         | B: $1a$          | 0.0000 | 0.0000  | 0.7990 |
|                                       |                    |         | B: $1a$          | 0.0000 | 0.0000  | 0.9990 |
|                                       |                    |         | B: $2b$          | 0.3333 | 0.6667  | 0.0709 |
|                                       |                    |         | B: $2b$          | 0.3333 | 0.6667  | 0.2709 |
|                                       |                    |         | B: $2b$          | 0.3333 | 0.6667  | 0.4709 |
|                                       |                    | B: $2b$ | 0.3333           | 0.6667 | 0.6710  |        |
|                                       |                    | B: $2b$ | 0.3333           | 0.6667 | 0.8709  |        |
| $\text{Li}_6\text{B}_5$<br>( $C2/m$ ) | $a=8.672$          |         | Li: $4i$         | 0.1684 | 0.0000  | 0.1944 |
|                                       | $b=3.974$          |         | Li: $4i$         | 0.1661 | 0.0000  | 0.5273 |
|                                       | $c=7.947$          |         | Li: $4i$         | 0.1651 | 0.0000  | 0.8615 |
|                                       | $\beta=127.4$      |         | B: $2d$          | 0.0000 | 0.5000  | 0.5000 |
|                                       |                    |         | B: $4i$          | 0.4998 | 0.0000  | 0.0999 |

|                                |                |     |    |        |        |        |
|--------------------------------|----------------|-----|----|--------|--------|--------|
|                                |                | B:  | 4i | 0.4997 | 0.0000 | 0.6997 |
| Li <sub>5</sub> B <sub>4</sub> | a=16.303       | Li: | 2c | 0.5000 | 0.5000 | 0.0000 |
| (Immm)                         | b=3.138        | Li: | 4e | 0.2188 | 0.0000 | 0.0000 |
|                                | c=4.039        | Li: | 4f | 0.0895 | 0.5000 | 0.0000 |
|                                |                | B:  | 8n | 0.3582 | 0.2504 | 0.0000 |
| Li <sub>7</sub> B <sub>6</sub> | a=8.638        | Li: | 4a | 0.0101 | 0.0500 | 0.8103 |
| (Cc)                           | b=13.876       | Li: | 4a | 0.5101 | 0.0424 | 0.8206 |
|                                | c=7.553        | Li: | 4a | 0.2705 | 0.0517 | 0.3283 |
|                                | $\beta$ =144.4 | Li: | 4a | 0.7709 | 0.0387 | 0.3231 |
|                                |                | Li: | 4a | 0.4533 | 0.2158 | 0.7030 |
|                                |                | Li: | 4a | 0.1327 | 0.2142 | 0.0485 |
|                                |                | Li: | 4a | 0.2979 | 0.2843 | 0.8812 |
|                                |                | B:  | 4a | 0.2027 | 0.1199 | 0.7105 |
|                                |                | B:  | 4a | 0.0521 | 0.1211 | 0.3866 |
|                                |                | B:  | 4a | 0.7044 | 0.1240 | 0.7124 |
|                                |                | B:  | 4a | 0.5569 | 0.1232 | 0.3880 |
|                                |                | B:  | 4a | 0.3867 | 0.1191 | 0.0536 |
|                                |                | B:  | 4a | 0.3790 | 0.3795 | 0.5485 |
| LiB <sub>4</sub>               | a=4.666        | Li: | 4h | 0.0000 | 0.2784 | 0.5000 |
| (Immm)                         | b=5.818        | B:  | 4i | 0.0000 | 0.0000 | 0.1593 |
|                                | c=5.503        | B:  | 4g | 0.0000 | 0.2853 | 0.0000 |
|                                |                | B:  | 8m | 0.3085 | 0.0000 | 0.3420 |
| LiB <sub>6</sub>               | a= 9.104       | Li: | 4g | 0.1631 | 0.0000 | 0.0000 |
| (Cmmm)                         | b= 4.781       | B:  | 8n | 0.0000 | 0.8077 | 0.6798 |
|                                | c= 4.781       | B:  | 8o | 0.4035 | 0.0000 | 0.8087 |
|                                |                | B:  | 8q | 0.1636 | 0.3203 | 0.5000 |

---
